# Supplementary material for: Stepwise evolution of pandrug-resistance in Klebsiella pneumoniae
Source: PubMed Central journal article supplement (PMC4609946; doi:10.1038/srep15082), 2015-10-19
Supplement: srep15082-s1.pdf [file srep15082-s1.pdf]

## Supplementary Information

### Supplement to: Stepwise evolution of pandrug-resistance in *Klebsiella pneumoniae*

Hosam M. Zowawi<sup>^</sup>, Brian Forde<sup>^</sup>, Mubarak Alfaresi, Abdulqadir Alzarouni, Yasser Farahat, Teik-Min Chong, Wai-Fong Yin, Kok-Gan Chan, Jian Li, Mark A. Schembri, Scott A. Beatson\*, David L. Paterson\*

**<sup>^</sup> These authors contributed equally.**

**\* These authors contributed equally (corresponding authors)**

## Supplementary Results:

### Genome assembly of *Klebsiella pneumoniae* MS6671

Two PacBio SMRT cells yielded a 6,061,819 base-pair (bp) draft assembly in ten contiguous fragments (contigs) with an average contig length of 606,182 bp. The chromosome of MS6671 was represented by two contigs (3,207,177 bp and 2,216,049 bp respectively) which were merged during post-processing steps to yield a single contig of 5,418,846 bp. Overlapping sequences on the 5' and 3' ends were then trimmed based on sequence homology to produce a circular contig of 5,402,900 bp with an average depth of coverage of 108 x.

Six of the remaining seven contigs comprised the plasmid content of MS6671. Duplicate sequences at the 5' and 3' ends of 5 of 6 plasmids (pMS6671A-E) indicated that they were circular in nature and were considered completely assembled following trimming.

The MS6671 genome also contained a single linear plasmid prophage, phiMS6671, which is similar to the *K. oxytoca* linear plasmid prophage phiKO2 (gb|AY374448) and phage N15 from *E. coli* (gb|AF064539.1). Perfect inverted repeats on the 5' and 3' ends of phiMS6671 (5'-CCATTATACGC|GCGTATAATGG-3'; where "|" denotes the centre of symmetry) determined the telRL site (site of telomere formation) where the 5' and 3' ends are covalently joined to form a circle<sup>1,2</sup>.

The assembly of MS6671 also produced a small spurious contig aligning to position 2811555 to 2822978 on the chromosome and position 6284 to 17703 on pMS6671E. This contig resulted from the assembly of reads containing an

11.4 kb segment of a class 1 integron present on both the chromosome and on pMS6671E. Despite this ambiguity, long-reads were found to cover both the chromosomal and plasmid copies of the integron indicating that the spurious 11kb contig was a collapsed repeat formed by shorter, non-spanning reads derived from the two integron loci. Finally, a circular 4.3 kb contig identical to PacBio's SMRTbell internal plasmid control was removed from the assembly.

### ***K. pneumoniae* MS6671 plasmid features**

The MS6671 plasmids varied in terms of their size, DNA composition and complement of antimicrobial resistance genes (Supplementary Table 1). Two of the five MS6671 circular plasmids encoded antibiotic resistance genes: pMS6671B and pMS6671E. The multi-drug resistance (MDR) region in pMS6671B consists of an integron carrying the *dfrA14* (trimethoprim resistance) gene. The integron is flanked by two IS6-like elements (IS26 upstream and IS6100 downstream). The *qnrB* (quinolone resistance) was located immediately upstream of the integron. Similarly, the MDR region of pMS6671E consisted of a class 1 integron flanked by two IS6-like elements (IS26 upstream and IS6100 downstream). This integron was nearly identical to the class 1 integron located on the chromosome (Figure 1), except that the plasmid-borne integron has a two-resistance gene cassette (*dfrA12* and *aadA2*) in place of the single *arr-3* gene cassette in the chromosomal class 1 integron (Supplementary Figure 2). Based on its identity to phiKO2, and the presence of covalently closed hairpin telomeres, phiMS6671 is predicted to encode a linear plasmid prophage. This type of temperate bacteriophage are known to replicate in the lysogen as a low copy number circular plasmid <sup>1</sup>.

### **Identification of antibiotic resistance genes.**

With the exception of tigecycline, acquired or intrinsic resistance genes were identified within the *K. pneumoniae* MS6671 genome that could account for all observed antibiotic resistance phenotypes (Supplementary Table 2). The AcrAB-TolC efflux pump is an important multi-drug resistance factor whose overexpression has previously been associated with resistance to tigecycline<sup>3,4</sup>. In *K. pneumoniae* overexpression of *ramA* has been directly linked to increased expression of *acrAB* and reduced susceptibility to tigecycline<sup>5</sup>. Upregulation of *ramA* can result from mutations in the *ramA* gene or from inactivation of its negative regulator, RamR<sup>6</sup>. The nucleotide sequence of *ramA* from *K. pneumoniae* MS6671 is identical to that of tigecycline susceptible *K. pneumoniae* subsp. *pneumoniae* MGH 78578 [GenBank: CP000647.1] and likely contains no expression-enhancing mutations. In contrast, the *ramR* gene carries a single non-synonymous mutation (Arg3Ser) that could potentially be involved in tigecycline resistance. This mutation is different to those previously associated with reduced tigecycline susceptibility in *Klebsiella*<sup>6</sup> and lies outside the predicted DNA binding and target recognition domains of this TetR-type repressor, according to a comparison with the recently derived crystal structure of RamR (PDB accession: 3VVX) from *Salmonella enterica* subsp. *enterica* serovar Typhimurium str. 14028S<sup>7</sup>.

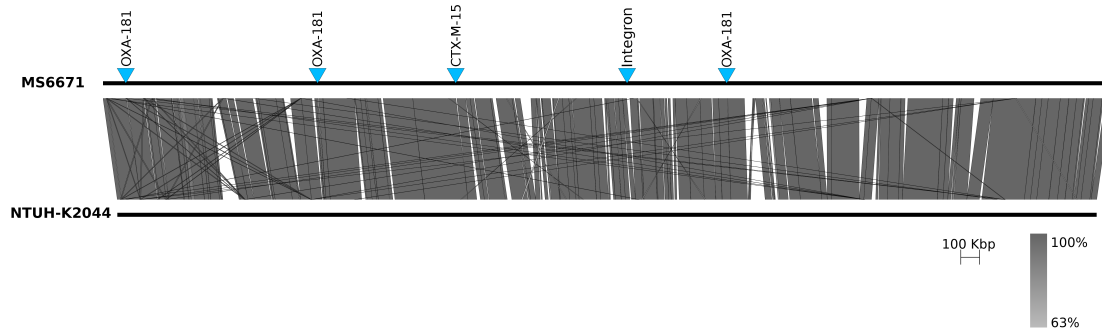

**Figure S1. Whole chromosome comparison of *K. pneumoniae* strains MS6671 and NTUH-K2044.** Pair-wise nucleotide comparison of the chromosomes from *K. pneumoniae* strains MS6671 (top) and NTUH-K2044 (bottom), the closest available complete *K. pneumoniae* genome sequence. (A) Linear alignments with BLASTn revealed a high degree of synteny between both strains that is disrupted a number of regions of difference. Additionally, the four MS6671 *ISEcp1* elements and the multi-resistant integron (blue arrows) were entirely absent from NTUH-K2044. Grey shading indicates regions of homology between both genomes.

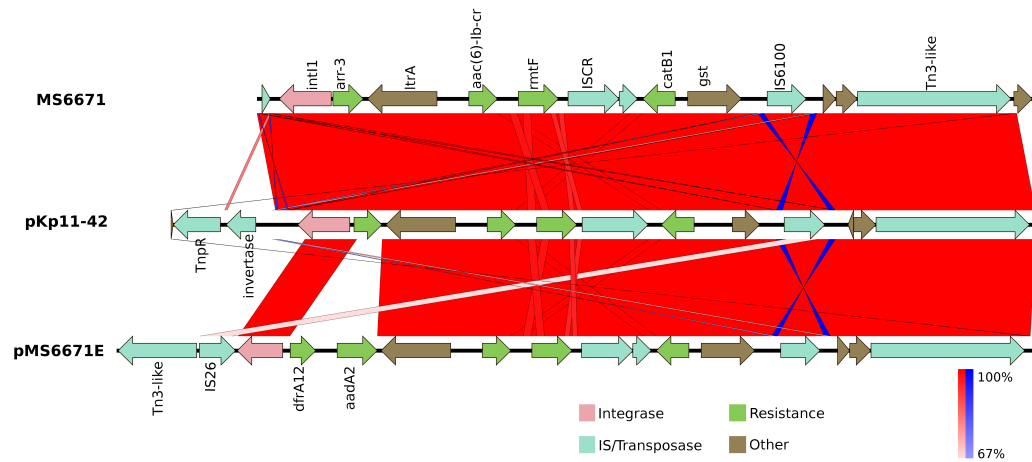

**Figure S2. Class 1 integrons in *K. pneumoniae* MS6671.** Pair-wise nucleotide comparisons of class 1 integrons from the chromosome of *K. pneumoniae* MS6671, previously sequenced *K. pneumoniae* plasmid pKp11-42 (Accession KF295829) and the ~85 kb plasmid from *K. pneumoniae* MS6671 (pMS6671E). The region downstream of the gene cassette array is identical in all three integrons. However, pMS6671E contains a different gene cassette array (*dfrA12* and *aadA2* instead of *arr-3*) compared to MS6671 and pKp11-42, which possess identical gene cassettes. Red shading indicates identity between sequences that are in the same orientation. Blue shading indicates identity between sequences that are in the opposite orientation.

**Table S1.** Extra-chromosomal elements carried by *K. pneumoniae* MS6671.

| Plasmid                | Size   | GC   | CDS | Circular | Resistance genes                                                                 | closest homology                                                                      |
|------------------------|--------|------|-----|----------|----------------------------------------------------------------------------------|---------------------------------------------------------------------------------------|
| pMS6671A               | 279305 | 46.7 | 292 | Y        | NA                                                                               | <i>K. pneumoniae</i> Kp15 plasmid pENVA (99% nucleotide identity, 72% query coverage) |
| pMS6671B               | 118323 | 52.5 | 136 | Y        | <i>qnrB</i> , <i>dfrA14</i>                                                      | <i>K. pneumoniae</i> KPX plasmid pKPX-1 (99% nucleotide identity, 88% query coverage) |
| pMS6671C               | 34064  | 48.6 | 50  | Y        | NA                                                                               | <i>C. freundii</i> CFSTE plasmid pN-Cit (99% nucleotide identity, 98% query coverage) |
| pMS6671D               | 4715   | 41.1 | 3   | Y        | NA                                                                               | <i>E. coli</i> CA46 plasmid pColG (99% nucleotide identity, 100% query coverage)      |
| pMS6671E               | 84940  | 52.8 | 89  | Y        | <i>dfrA12</i> , <i>aadA2</i> , <i>aac(6')-Ib-cr</i> , <i>rmtF</i> , <i>catB1</i> | <i>E. coli</i> 3A11 plasmid pHN3A11 (99% nucleotide identity, 75% query coverage)     |
| phiMS6671 <sup>1</sup> | 55416  | 53.1 | 59  | Y        | NA                                                                               | <i>K. oxytoca</i> Bacteriophage phiKO2 (89% nucleotide identity, 63% query coverage)  |

<sup>1</sup> phiMS6671 is predicted to encode a linear plasmid prophage with covalently closed hairpin telomeres similar to phiKO2 from *K. oxytoca* (AY374448.1) and phage N15 from *E. coli* (gb|AF064539.1). This type of temperate bacteriophage are known to replicate in the lysogen as a low copy number circular plasmid <sup>1</sup>.

**Table S2.** Antibiotic resistance genes carried by *K. pneumoniae* MS6671.

| Gene                          | locus tag          | Location    | Coordinates (start-stop) | Requirements for resistant phenotype | Genes previously associated with resistance #                                                                  | Comments |
|-------------------------------|--------------------|-------------|--------------------------|--------------------------------------|----------------------------------------------------------------------------------------------------------------|----------|
| <i>bla</i> <sub>OXA-181</sub> | MS6671_01100       | Chr, ISEcp1 | 127892-128689            |                                      | Cloxacillin, Penicillin(Ampicillin), Carbapenems                                                               |          |
| <i>fosA</i>                   | MS6671_05820       | Chr         | 659831-660253            |                                      | Fosfomycin                                                                                                     |          |
| <i>mdtM</i>                   | MS6671_05970       | Chr         | 676105-674864            |                                      | Acriflavine, Chloramphenicol, Norfloxacin                                                                      |          |
| <i>mrcB/pbp1b</i>             | MS6671_08560       | Chr         | 964685-967243            |                                      | Penicillin(Ampicillin)                                                                                         |          |
| <i>bla</i> <sub>OXA-181</sub> | MS6671_10420       | Chr, ISEcp1 | 1154212-1155009          |                                      | Cloxacillin, Penicillin(Ampicillin), Carbapenems                                                               |          |
| <i>mdtG</i>                   | MS6671_10750       | Chr         | 1187274-118473           |                                      | deoxycholate, fosfomycin                                                                                       |          |
| <i>acrAB</i>                  | MS6671_11940-11950 | Chr         | 1306830-1311192          |                                      | aminoglycoside (Gentamicin, Tobramycin, Amikacin), glycycline(Tigercyclin), macrolide, beta-lactam, acriflavin |          |
|                               |                    |             |                          |                                      | tetracycline, chloramphenicol,                                                                                 |          |



|                               |                    |                  |                 |                               |                                                                                                                                       |                                                                     |
|-------------------------------|--------------------|------------------|-----------------|-------------------------------|---------------------------------------------------------------------------------------------------------------------------------------|---------------------------------------------------------------------|
|                               |                    |                  |                 |                               | fluroquinolones                                                                                                                       |                                                                     |
| <i>macAB</i>                  | MS6671_16640-16650 | Chr              | 1830363-1831478 |                               | macrolide                                                                                                                             |                                                                     |
| <i>bla<sub>CTX-M-15</sub></i> | MS6671_17120       | Chr, ISEcp1      | 1893933-1894808 |                               | monobactam(Aztreonam),penicillin (Ampicillin),Cephalosporin_i, Cephalosporin_ii, Cephalosporin_iii(Ceftriaxone, Ceftazidime,Cefepime) |                                                                     |
| <i>ompK35</i>                 | MS6671_17150       | Chr              | 1896479-1897336 | Disruption,<br>non-expression | Beta-lactams,chloramphenicol, quinolones,tetracyclins                                                                                 | Presumed to be non-functional due to disruption by ISEcp1 insertion |
| <i>bla<sub>SHV-36</sub></i>   | MS6671_23530       | Chr              | 2564949-2565809 |                               | monobactam(Aztreonam), e_cephalosporin,n_cephalosporin, penicillin(Ampicillin)                                                        |                                                                     |
| <i>pbp2</i>                   | MS6671_25600       | Chr              | 2774619-2776529 |                               | Penicillin(Ampicillin)                                                                                                                |                                                                     |
| <i>arr-3</i>                  | MS6671_25990       | Chr,<br>Integron | 2810803-2811396 |                               | Rifampin                                                                                                                              |                                                                     |
| <i>aac(6')-Ib-cr</i>          | MS6671_26010       | Chr,<br>Integron | 2813451-2814005 |                               | isepamicin,netilmicin,tobramycin,amikacin, sisomicin,dibekacin                                                                        |                                                                     |
| <i>rmtF</i>                   | MS6671_26020       | Chr,<br>Integron | 2814416-2815195 |                               | aminoglycoside (Gentamicin,Tobramycin,Amikacin)                                                                                       |                                                                     |
| <i>catB1</i>                  | MS6671_26060       | Chr,<br>Integron | 2816842-2817474 |                               | Chloramphenicol                                                                                                                       |                                                                     |

|                               |                    |             |                                    |                               |                                                                                             |                                                                                                                                                                                                                                                                                                                                            |
|-------------------------------|--------------------|-------------|------------------------------------|-------------------------------|---------------------------------------------------------------------------------------------|--------------------------------------------------------------------------------------------------------------------------------------------------------------------------------------------------------------------------------------------------------------------------------------------------------------------------------------------|
| <i>mdtK</i>                   | MS6671_27670       | Chr         | 2982916-2984289                    |                               | enoxacin,norfloxacin                                                                        |                                                                                                                                                                                                                                                                                                                                            |
| <i>mdtM</i>                   | MS6671_28580       | Chr         | 3077840-3079072                    |                               | Acriflavine,Chloramphenicol,<br>Norfloxacin                                                 |                                                                                                                                                                                                                                                                                                                                            |
| <i>rmlA</i>                   | MS6671_30980       | Chr         | 3341668-3342462                    |                               | viomycin                                                                                    |                                                                                                                                                                                                                                                                                                                                            |
| <i>bla</i> <sub>OXa-181</sub> | MS6671_31030       | Chr, ISEcp1 | 3346114-3346911                    |                               | Cloxacillin,Penicillin(Ampicillin),<br>Carbapenems                                          |                                                                                                                                                                                                                                                                                                                                            |
| <i>mgrB</i>                   | MS6671_31060       | Chr         | 3345782-3345799<br>3348697-3348822 | Disruption,<br>non-expression | Polymyxin(Colistin)                                                                         | <i>mgrB</i> is a negative regulator of <i>phoPQ</i> . Knockout of <i>mgrB</i> results in upregulation of <i>phoPQ</i> and the <i>pmrHFIJKLM</i> operon activating the LPS modification system responsible for colistin resistance. <i>mgrB</i> is presumed to be non-functional due to disruption by ISEcp1- <i>bla</i> <sub>OXa-181</sub> |
| <i>gyrA</i>                   | MS6671_34470       | Chr         | 3730282-3732915                    | Ser83Ile                      | Ciprofloxacin                                                                               |                                                                                                                                                                                                                                                                                                                                            |
| <i>oqxAB</i>                  | MS6671_38430-38440 | Chr         | 4153411-4154586                    |                               | Chloramphenicol,Fluoroquinolone                                                             |                                                                                                                                                                                                                                                                                                                                            |
| <i>emrAB</i>                  | MS6671_38870-38880 | Chr         | 4198501-4199673                    |                               | Cefepime,Ceftazidime,Ceftriaxone,<br>Erythromycin,Spectinomycin,<br>Tetracycline,Tobramycin |                                                                                                                                                                                                                                                                                                                                            |

|                                              |                    |                       |                 |                     |                                                                                                        |                                                                                                                                                              |
|----------------------------------------------|--------------------|-----------------------|-----------------|---------------------|--------------------------------------------------------------------------------------------------------|--------------------------------------------------------------------------------------------------------------------------------------------------------------|
| <i>mdtNOP</i>                                | MS6671_41620-41640 | Chr                   | 4496490-4500910 |                     | acriflavine,puromycin,t_chloride                                                                       |                                                                                                                                                              |
| <i>parC</i>                                  | MS6671_42890       | Chr                   | 4627001-4629259 | Ser80Ile            | fluoroquinolone                                                                                        |                                                                                                                                                              |
| <i>acrEF</i>                                 | MS6671_45560-45570 | Chr                   | 4889193-4890332 |                     |                                                                                                        | <i>arcEF</i> does not directly contribute to multidrug resistance but has been shown to suppress the hyper-drug sensitivity of <i>acrAB</i> deletion mutants |
| <i>mcrA/pbp1a</i>                            | MS6671_46460       | Chr                   | 4965652-4968210 |                     | Penicillin(Ampicillin)                                                                                 |                                                                                                                                                              |
| <i>pmrHFIJKLM</i>                            | MS6671_47260-47320 | Chr                   | 5052022-5059397 | activation by PhoPQ | Polymyxin(Colistin)                                                                                    | Up-regulation of <i>pmr</i> operon by insertional inactivation of <i>mgrB</i>                                                                                |
| MS6671_49290<br>MS6671_49300<br>MS6671_49310 | MS6671_49290-49310 | Chr                   | 5284306-5289905 |                     | aminoglycoside(Gentamicin, Tobramycin,Amikacin), Beta-lactam,fluroquinolone, tetracycline, tigecycline | Homolog of <i>mexAB-oprM</i> from <i>Pseudomonas aeruginosa</i> (~50% ammino acid identity). Low level resistance                                            |
| <i>bcr</i>                                   | MS6671_49320       | Chr                   | 5289951-5291114 |                     | Bicyclomycin                                                                                           |                                                                                                                                                              |
| <i>mdtL</i>                                  | MS6671_50110       | Chr                   | 5373659-5374837 |                     | Chloramphenicol                                                                                        |                                                                                                                                                              |
| <b>Plasmids</b>                              |                    |                       |                 |                     |                                                                                                        |                                                                                                                                                              |
| <i>qnrB</i>                                  | MS6671_pB0950      | pMS6671B,<br>Integron | 76576-77220     |                     | fluoroquinolone                                                                                        |                                                                                                                                                              |

|                      |               |                       |             |  |                                                                   |  |
|----------------------|---------------|-----------------------|-------------|--|-------------------------------------------------------------------|--|
| <i>dfra14</i>        | MS6671_pB0910 | pMS6671B,<br>Integron | 80512-80985 |  | trimethoprim                                                      |  |
| <i>dfra12</i>        | MS6671_pE0050 | pMS6671E,<br>Integron | 4434-4931   |  | Trimethoprim                                                      |  |
| <i>aadA2</i>         | MS6671_pE0060 | pMS6671E,<br>Integron | 5351-6130   |  | Spectinomycin,streptomycin                                        |  |
| <i>aac(6')-Ib-cr</i> | MS6671_pE0080 | pMS6671E,<br>Integron | 8180-8734   |  | isepamicin,netilmicin,tobramycin,<br>amikacin,sisomicin,dibekacin |  |
| <i>rmtF</i>          | MS6671_pE0090 | pMS6671E,<br>Integron | 9145-9924   |  | aminoglycoside<br>(Gentamicin,Tobramycin,Amikacin)                |  |
| <i>catB1</i>         | MS6671_pE0120 | pMS6671E,<br>Integron | 11571-12203 |  | Chloramphenicol                                                   |  |

**Table S3.** Inverted repeat sequences for ISEcp1-*bla*<sub>OXA-181</sub>-mediated transposition

| Description of sequence               | Nucleotide sequence*#                          | Coordinates                        |
|---------------------------------------|------------------------------------------------|------------------------------------|
| ISEcp1 IRL                            | CCTAGATTCTACGT                                 | 126108..126121                     |
|                                       |                                                | 1152428..1152441                   |
|                                       |                                                | 3348682..3348695                   |
| ISEcp1 IRR                            | ACGTGGAATTTAGG                                 | 127750..127623                     |
|                                       |                                                | 1154070..1154083                   |
|                                       |                                                | 3347040..3347053                   |
| ISEcp1- <i>bla</i> OXA-181<br>IRRalt1 | <b>GTGGCGAT</b> <u>GT</u> <u>CA</u> <b>G</b> T | 1155269..1155282                   |
| ISEcp1- <i>bla</i> OXA-181<br>IRRalt2 | <b>CTGGCGAT</b> <u>CCT</u> <u>CG</u> <b>C</b>  | 128986..128999<br>3345804..3345817 |

\* Underlined nucleotides are identical to those in the same position in the IRR of ISEcp1

# Nucleotides which are identical at the same position in IRRalt1 and IRRalt2 are highlighted in red bold

## References

- 1 Casjens, S. R. *et al.* The pKO2 linear plasmid prophage of *Klebsiella oxytoca*. *J Bacteriol* **186**, 1818-1832 (2004).
- 2 Deneke, J., Ziegelin, G., Lurz, R. & Lanka, E. The protelomerase of temperate *Escherichia coli* phage N15 has cleaving-joining activity. *Proceedings of the National Academy of Sciences of the United States of America* **97**, 7721-7726 (2000).
- 3 Bratu, S., Landman, D., George, A., Salvani, J. & Quale, J. Correlation of the expression of *acrB* and the regulatory genes *marA*, *soxS* and *ramA* with antimicrobial resistance in clinical isolates of *Klebsiella pneumoniae* endemic to New York City. *J Antimicrob Chemother* **64**, 278-283, doi:10.1093/jac/dkp186 (2009).
- 4 Roy, S., Datta, S., Viswanathan, R., Singh, A. K. & Basu, S. Tigecycline susceptibility in *Klebsiella pneumoniae* and *Escherichia coli* causing neonatal septicaemia (2007-10) and role of an efflux pump in tigecycline non-susceptibility. *J Antimicrob Chemother* **68**, 1036-1042, doi:10.1093/jac/dks535 (2013).
- 5 Ruzin, A., Immermann, F. W. & Bradford, P. A. Real-time PCR and statistical analyses of *acrAB* and *ramA* expression in clinical isolates of *Klebsiella pneumoniae*. *Antimicrob Agents Chemother* **52**, 3430-3432, doi:10.1128/AAC.00591-08 (2008).
- 6 Hentschke, M., Wolters, M., Sobottka, I., Rohde, H. & Aepfelbacher, M. *ramR* mutations in clinical isolates of *Klebsiella pneumoniae* with reduced susceptibility to tigecycline. *Antimicrob Agents Chemother* **54**, 2720-2723, doi:10.1128/AAC.00085-10 (2010).
- 7 Yamasaki, S. *et al.* The crystal structure of multidrug-resistance regulator RamR with multiple drugs. *Nat Commun* **4**, 2078, doi:10.1038/ncomms3078 (2013).
